# Supplementary material for: Mouse hypothalamic GT1-7 cells demonstrate AMPK-dependent intrinsic glucose-sensing behaviour
Source: PubMed Central journal article supplement — Diabetologia. 2012 Jul 4;55(9):2432–44. doi: 10.1007/s00125-012-2617-y (PMC3411292; doi:10.1007/s00125-012-2617-y), 2012-07-04
Supplement: 125_2012_2617_MOESM1_ESM.pdf [file 125_2012_2617_MOESM1_ESM.pdf]

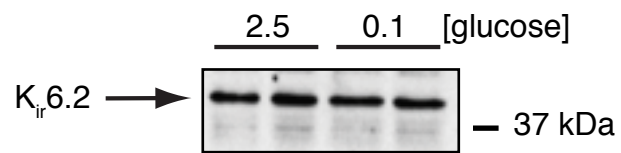

**ESM Fig. 1.** Immunoblot for Kir6.2 in GT1-7 cells. Levels of Kir6.2 were determined in GT1-7 cells, which were maintained in 2.5 or 0.1 mmol/l glucose for 30 minutes prior to lysis.
