# Supplementary material for: Mouse hypothalamic GT1-7 cells demonstrate AMPK-dependent intrinsic glucose-sensing behaviour
Source: PubMed Central journal article supplement — Diabetologia. 2012 Jul 4;55(9):2432–44. doi: 10.1007/s00125-012-2617-y (PMC3411292; doi:10.1007/s00125-012-2617-y), 2012-07-04
Supplement: 125_2012_2617_MOESM2_ESM.pdf [file 125_2012_2617_MOESM2_ESM.pdf]

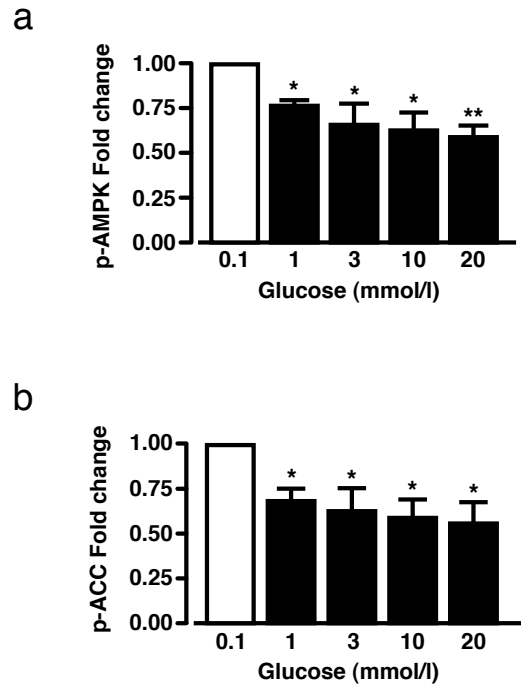

**ESM Fig. 2.** Effect of glucose on p-AMPK and p-ACC levels in GT1-7 cells. Bar graphs show the mean relative levels of p-AMPK (a) and p-ACC (b) as a function of the glucose concentration ( $n = 5$  for each point). Values are mean  $\pm$  SEM. \*  $P < 0.05$ , \*\*  $P < 0.01$
